# Supplementary material
Source: publisher site journal article supplement (https://www.dovepress.com/article/467424)
Supplement: Supplementary file 1 [file get_supplementary_file.php]

Supplementary Table 1 Association of SIC score and new-onset atrial fibrillation in univariate logistic regression.

| Variables | OR;95%CI | P-value |
| --- | --- | --- |
| Age | 1.058;(1.042–1.075) | <0.001 |
| Gender |  | 0.014 |
| Female | 1 |  |
| Male | 1.634;(1.103–2.420) |  |
| Vital signs |  |  |
| HR | 1.010;(1.001–1.019) | 0.022 |
| RR | 0.994;(0.963-1.027) | 0.717 |
| MAP | 1.001;(0.990-1.012) | 0.903 |
| Disease severity score |  |  |
| APACHEII score | 1.074;(1.049–1.099) | <0.001 |
| SOFA | 1.039;(0.989-1.092) | 0.127 |
| GCS | 0.968;(0.920-1.018) | 0.201 |
| Comorbidities,n(%) |  |  |
| Congestive heart failure | 3.163;(2.059–4.858) | <0.001 |
| Diabetes | 1.147;(0.793-1.660) | 0.466 |
| Hypertension | 1.363;(0.956-1.945) | 0.087 |
| Liver failure | 0.665;(0.320–1.380) | 0.273 |
| Renal failure | 2.984;(2.069–4.304) | <0.001 |
| Stroke | 2.616;(1.811–3.780) | <0.001 |
| COPD | 2.311;(1.328–4.021) | 0.003 |
| CRP | 1.001;(0.999-1.003) | 0.311 |
| PCT | 1.006;(1.000-1.011) | 0.041 |
| Kalium | 1.257;(0.949-1.665) | 0.111 |
| Coagulation function |  |  |
| PLT | 0.998;(0.996-1.000) | 0.028 |
| PT | 1.022;(0.980-1.065) | 0.304 |
| INR | 1.417;(0.986-2.035) | 0.059 |
| APTT | 1.003;(0.986-1.021) | 0.701 |
| Fib | 0.999;(0.931-1.073) | 0.989 |
| FDP | 1.003;(0.998-1.008) | 0.294 |
| D-II | 1.007;(0.986-1.028) | 0.535 |
| SIC score | 1.227;(1.065–1.412) | 0.004 |
| SIC score=2 or 3 | 0.689;(0.485-0.980) | 0.038 |
| SIC score=4 or 5 | 1.286;(0.897-1.845) | 0.171 |
| SIC score=6 | 1.632;(0.878-3.036) | 0.122 |

HR, heart rate; RR, respiratory rate; MAP, mean arterial pressure; SOFA, sequential organ failure assessment; APACHEII score, Acute Physiology and Chronic Health Evaluation score; GCS, Glasgow coma score; COPD, chronic obstructive pulmonary disease; CRP, c-reactive protein; PCT, procalcitonin; PLT, platelet count; PT, prothrombin time; INR, international normalized ratio; APTT, activated partial thromboplastin time; Fib,fibrinogen; D-II, d-dimer; FDP, fibrinogen degradation product; SIC score, Sepsis-induced coagulopathy score.

Supplementary Table 2 Univariable and multivariable logistic regression analysis of SIC score on mortality in septic new-onset atrial fibrillation patients.

|  | Univariate | | Multivariate | |
| --- | --- | --- | --- | --- |
|  | OR;95%CI | P-value | OR;95%CI | P-value |
| In-hospital mortality | 1.158;(0.872-1.537) | 0.312 | 0.720;(0.370-1.401) | 0.333 |
| 28-day mortality | 1.197;(0.878–1.632) | 0.256 | 1.268;(0.705–2.282) | 0.428 |
| 90-day mortality | 1.252;(0.936–1.674) | 0.129 | 0.698;(0.351–1.388) | 0.305 |

Multivariable logistic regression analysis includes the factors of gender, HR, congestive heart failure, renal failure, stroke, COPD, hypertension, PLT, PCT, INR and SIC score.
